# Supplementary material for: Adding Sodium–Glucose Co-Transporter 2 Inhibitors to Sulfonylureas and Risk of Hypoglycemia: A Systematic Review and Meta-Analysis of Randomized Controlled Trials
Source: Frontiers journal article supplement (doi:10.3389/fendo.2021.713192), 2021-10-21
Supplement: Data_Sheet_1.PDF [file Data_Sheet_1.PDF]

## eFigure 1: Search Strategy

### PubMed

- #1 sglT[Title/Abstract]
- #2 sglT2[Title/Abstract]
- #3 Sodium-Glucose Transporter 2[Title/Abstract]
- #4 Sodium Glucose Cotransporters[Title/Abstract]
- #5 Sodium Glucose Transporters[Title/Abstract]
- #6 Sodium Glucose Transport System[Title/Abstract]
- #7 SGLT Proteins[Title/Abstract]
- #8 Glucose-Sodium Transport System[Title/Abstract]
- #9 "Sodium Glucose Transport Proteins\*"[Title/Abstract]
- #10 Sodium-Glucose Transport Proteins [MeSH Terms]
- #11 Ipragliflozin[Title/Abstract]
- #12 Suglat[Title/Abstract])
- #13 ASP1941[Title/Abstract]
- #14 ASP-1941[Title/Abstract]
- #15 empagliflozin[Title/Abstract]
- #16 BI10773[Title/Abstract]
- #17 BI-10773[Title/Abstract])
- #18 Jardiance[Title/Abstract]
- #19 Phlorhizin[Title/Abstract]
- #20 Phloridzin [Title/Abstract]
- #21 tofogliflozin[Title/Abstract]
- #22 CSG452[Title/Abstract]
- #23 CSG-452[Title/Abstract]
- #24 Apleway[Title/Abstract]
- #25 Deberza[Title/Abstract]
- #26 R-7201[Title/Abstract]
- #27 R7201[Title/Abstract]))))
- #28 sergliflozin[Title/Abstract]
- #29 GW869682[Title/Abstract]
- #30 GW-869682[Title/Abstract]
- #31 KGT1251[Title/Abstract]
- #32 KGT-1251[Title/Abstract]
- #33 ertugliflozin[Title/Abstract]
- #34 PF-04971729[Title/Abstract]
- #35 PF04971729[Title/Abstract]
- #36 MK-8835[Title/Abstract]
- #37 MK8835[Title/Abstract]
- #38 WAY-123783[Title/Abstract]
- #39 WAY123783[Title/Abstract]
- #40 TS-071[Title/Abstract]

#41 TS071[Title/Abstract]  
#42 sotagliflozin[Title/Abstract])  
#43 LX-4211[Title/Abstract]  
#44 LX4211[Title/Abstract]  
#45 LP-802034[Title/Abstract]  
#46 LP802034[Title/Abstract]  
#47 T-1095[Title/Abstract]  
#48 T1095[Title/Abstract]  
#49 ISIS-SGLT2Rx[Title/Abstract]  
#50 ISISSGLT2Rx[Title/Abstract]  
#51 ISIS 388626[Title/Abstract]  
#52 ISIS-388626[Title/Abstract]  
#53 YM543[Title/Abstract]  
#54 YM-543[Title/Abstract]  
#55 AVE2268[Title/Abstract]  
#56 AVE-2268[Title/Abstract]  
#57 dapagliflozin[Title/Abstract]  
#58 BMS512148[Title/Abstract]  
#59 BMS-512148[Title/Abstract]  
#60 Canagliflozin[Title/Abstract]  
#61 Invokana[Title/Abstract]  
#62 JNJ-28431754[Title/Abstract]  
#63 TA-7284[Title/Abstract]  
#64 JNJ 28431754[Title/Abstract]  
#65 TA7284[Title/Abstract]  
#66 luseogliflozin[Title/Abstract]  
#67 Lusefi[Title/Abstract])  
#68 TS-071[Title/Abstract]  
#69 TS071[Title/Abstract]  
#70 bexagliflozin[Title/Abstract]  
#71 EGT0001442[Title/Abstract]  
#72 EGT-0001442[Title/Abstract]  
#73 THR-1442[Title/Abstract]  
#74 THR1442[Title/Abstract]  
#75 EGT0001474[Title/Abstract]  
#76 EGT-0001474[Title/Abstract]  
#77 OR/#1-76  
#78 "randomized controlled trial"[Publication Type]  
#79 "randomized controlled trials as topic"[MeSH Terms]  
#80 "randomised clinical trials"[All Fields]  
#81 "randomized clinical trials"[All Fields])  
#82 OR/78-81  
#83 #75 AND #80

## EMBASE

#1 'sglt':ab,ti  
#2 'sglt2':ab,ti  
#3 'sodium-glucose transporter 2':ab,ti  
#4 'sodium glucose cotransporters':ab,ti  
#5 'sodium glucose transporters':ab,ti  
#6 'sodium glucose transport system':ab,ti  
#7 'sglt proteins':ab,ti  
#8 'glucose-sodium transport system':ab,ti  
#9 'sodium glucose transport proteins\*':ab,ti  
#10 'sodium-glucose transport proteins\*':ab,ti  
#11 'ipragliflozin':ab,ti  
#12 'suglat':ab,ti  
#13 'asp1941':ab,ti  
#14 'asp-1941':ab,ti  
#15 'empagliflozin':ab,ti  
#16 'bi10773':ab,ti  
#17 'bi-10773':ab,ti  
#18 'jardiance':ab,ti  
#19 'phlorhizin':ab,ti  
#20 'phloridzin':ab,ti  
#21 'tofogliflozin':ab,ti  
#22 'csg452':ab,ti  
#23 'csg-452':ab,ti  
#24 'apleway':ab,ti  
#25 'deberza':ab,ti  
#26 'r-7201':ab,ti  
#27 'r7201':ab,ti  
#28 'sergliflozin':ab,ti  
#29 'gw869682':ab,ti  
#30 'gw-869682':ab,ti  
#31 'kgt1251':ab,ti  
#32 'kgt-1251':ab,ti  
#33 'ertugliflozin':ab,ti  
#34 'pf-04971729':ab,ti  
#35 'pf04971729':ab,ti  
#36 'mk-8835':ab,ti  
#37 'mk8835':ab,ti  
#38 'way-123783':ab,ti  
#39 'way123783':ab,ti  
#40 'ts-071':ab,ti  
#41 'ts071':ab,ti  
#42 'sotagliflozin':ab,ti

#43 'lx-4211':ab,ti  
#44 'lx4211':ab,ti  
#45 'lp-802034':ab,ti  
#46 'lp802034':ab,ti  
#47 't-1095':ab,ti  
#48 't1095':ab,ti  
#49 'isis-sglT2rx':ab,ti  
#50 'isissglT2rx':ab,ti  
#51 'isis388626':ab,ti  
#52 'isis-388626':ab,ti  
#53 'ym-543':ab,ti  
#54 'ym543':ab,ti  
#55 'ave-2268':ab,ti  
#56 'ave2268':ab,ti  
#57 'dapagliflozin':ab,ti  
#58 'bms512148':ab,ti  
#59 'bms-512148':ab,ti  
#60 'canagliflozin':ab,ti  
#61 'invokana':ab,ti  
#62 'jnj-28431754':ab,ti  
#63 'jnj28431754':ab,ti  
#64 'ta-7284':ab,ti  
#65 'ta7284':ab,ti  
#66 'luseogliflozin':ab,ti  
#67 'lusefi':ab,ti  
#68 'ts-071':ab,ti  
#69 'ts071':ab,ti  
#70 'bexagliflozin':ab,ti  
#71 'egt0001442':ab,ti  
#72 'egt-0001442':ab,ti  
#73 'thr-1442':ab,ti  
#74 'thr1442':ab,ti  
#75 'egt0001474':ab,ti  
#76 'egt-0001474':ab,ti  
#77 #1 OR #2 - #76  
#78 'randomized controlled trial'/exp  
#79 #77 AND #78

## The Cochrane library

- #1 MeSH descriptor: [Sodium-Glucose Transport Proteins] explode all trees
- #2 sgl:ti,ab,kw (Word variations have been searched)
- #3 sgl 2:ti,ab,kw (Word variations have been searched)
- #4 Sodium Glucose Transport Protein\*:ti,ab,kw (Word variations have been searched)
- #5 Glucose-Sodium Transport System:ti,ab,kw (Word variations have been searched)
- #6 SGLT Proteins:ti,ab,kw (Word variations have been searched)
- #7 Sodium Glucose Transporters:ti,ab,kw (Word variations have been searched)
- #8 Sodium Glucose Cotransporters:ti,ab,kw (Word variations have been searched)
- #9 Sodium-Glucose Transporter 2:ti,ab,kw (Word variations have been searched)
- #10 dapagliflozin\*:ti,ab,kw (Word variations have been searched)
- #11 BMS 512148:ti,ab,kw (Word variations have been searched)
- #12 BMS512148:ti,ab,kw (Word variations have been searched)
- #13 canagliflozin\*:ti,ab,kw (Word variations have been searched)
- #14 JNJ-28431754:ti,ab,kw (Word variations have been searched)
- #15 TA-7284:ti,ab,kw (Word variations have been searched)
- #16 JNJ28431754:ti,ab,kw (Word variations have been searched)
- #17 TA7284:ti,ab,kw (Word variations have been searched)
- #18 Ipragliflozin\*:ti,ab,kw (Word variations have been searched)
- #19 ASP1941:ti,ab,kw (Word variations have been searched)
- #20 ASP-1941:ti,ab,kw (Word variations have been searched)
- #21 empagliflozin\*:ti,ab,kw (Word variations have been searched)
- #22 bi10773:ti,ab,kw (Word variations have been searched)
- #23 BI-10773:ti,ab,kw (Word variations have been searched)
- #24 Jardiance\*:ti,ab,kw (Word variations have been searched)
- #25 bexagliflozin\*:ti,ab,kw (Word variations have been searched)
- #26 EGT0001442:ti,ab,kw (Word variations have been searched)
- #27 EGT-0001442:ti,ab,kw (Word variations have been searched)
- #28 THR-1442:ti,ab,kw (Word variations have been searched)
- #29 THR1442:ti,ab,kw (Word variations have been searched)
- #30 EGT0001474:ti,ab,kw (Word variations have been searched)
- #31 EGT-0001474:ti,ab,kw (Word variations have been searched)
- #32 WAY-123783:ti,ab,kw (Word variations have been searched)
- #33 WAY123783:ti,ab,kw (Word variations have been searched)
- #34 TS-071:ti,ab,kw (Word variations have been searched)
- #35 TS071:ti,ab,kw (Word variations have been searched)
- #36 Phlorhizin\*:ti,ab,kw (Word variations have been searched)

#37 Phloridzin\*:ti,ab,kw (Word variations have been searched)  
#38 tofogliflozin\*:ti,ab,kw (Word variations have been searched)  
#39 CSG452:ti,ab,kw (Word variations have been searched)  
#40 CSG-452:ti,ab,kw (Word variations have been searched)  
#41 Apleway\*:ti,ab,kw (Word variations have been searched)  
#42 Deberza\*:ti,ab,kw (Word variations have been searched)  
#43 R-7201:ti,ab,kw (Word variations have been searched)  
#44 R 7201:ti,ab,kw (Word variations have been searched)  
#45 sotagliflozin\*:ti,ab,kw (Word variations have been searched)  
#46 LX-4211:ti,ab,kw (Word variations have been searched)  
#47 LX4211:ti,ab,kw (Word variations have been searched)  
#48 LP802034:ti,ab,kw (Word variations have been searched)  
#49 T-1095:ti,ab,kw (Word variations have been searched)  
#50 LP-802034:ti,ab,kw (Word variations have been searched)  
#51 T1095:ti,ab,kw (Word variations have been searched)  
#52 ISIS-SGLT2Rx:ti,ab,kw (Word variations have been searched)  
#53 ISSSGLT2Rx:ti,ab,kw (Word variations have been searched)  
#54 ISIS 388626:ti,ab,kw (Word variations have been searched)  
#55 ISIS-388626:ti,ab,kw (Word variations have been searched)  
#56 ertugliflozin\*:ti,ab,kw (Word variations have been searched)  
#57 PF-04971729:ti,ab,kw (Word variations have been searched)  
#58 PF04971729:ti,ab,kw (Word variations have been searched)  
#59 MK-8835:ti,ab,kw (Word variations have been searched)  
#60 MK8835:ti,ab,kw (Word variations have been searched)  
#61 YM543:ti,ab,kw (Word variations have been searched)  
#62 YM-543:ti,ab,kw (Word variations have been searched)  
#63 AVE2268:ti,ab,kw (Word variations have been searched)  
#64 remogliflozin\*:ti,ab,kw (Word variations have been searched)  
#65 GSK 189075A:ti,ab,kw (Word variations have been searched)  
#66 GSK-189075A:ti,ab,kw (Word variations have been searched)  
#67 BHV-091009:ti,ab,kw (Word variations have been searched)  
#68 BHV 091009:ti,ab,kw (Word variations have been searched)  
#69 KGT-1681:ti,ab,kw (Word variations have been searched)  
#70 KGT1681:ti,ab,kw (Word variations have been searched)  
#71 sergliflozin:ti,ab,kw (Word variations have been searched)  
#72 GW869682:ti,ab,kw (Word variations have been searched)  
#73 GW-869682:ti,ab,kw (Word variations have been searched)  
#74 KGT1251:ti,ab,kw (Word variations have been searched)  
#75 KGT-1251:ti,ab,kw (Word variations have been searched)  
#76 luseogliflozin\*:ti,ab,kw (Word variations have been searched)  
#77 Lusefi\*:ti,ab,kw (Word variations have been searched)  
#78 #1 or #2 - #77

Clinicaltrial.gov

**"tofogliflozin" OR "empagliflozin" OR "dapagliflozin" OR "canagliflozin" OR  
"sotagliflozin" OR "luseogliflozin" OR "Ipragliflozin" OR "Sergliflozin" OR  
"ertugliflozin"**
